# Supplementary material for: Proteomic profiling in cerebral amyloid angiopathy reveals an overlap with CADASIL highlighting accumulation of HTRA1 and its substrates
Source: PubMed Central journal article supplement (PMC8785498; doi:10.1186/s40478-021-01303-6), 2022-01-24
Supplement: 40478_2021_1303_MOESM4_ESM.pdf [file 40478_2021_1303_MOESM4_ESM.pdf]

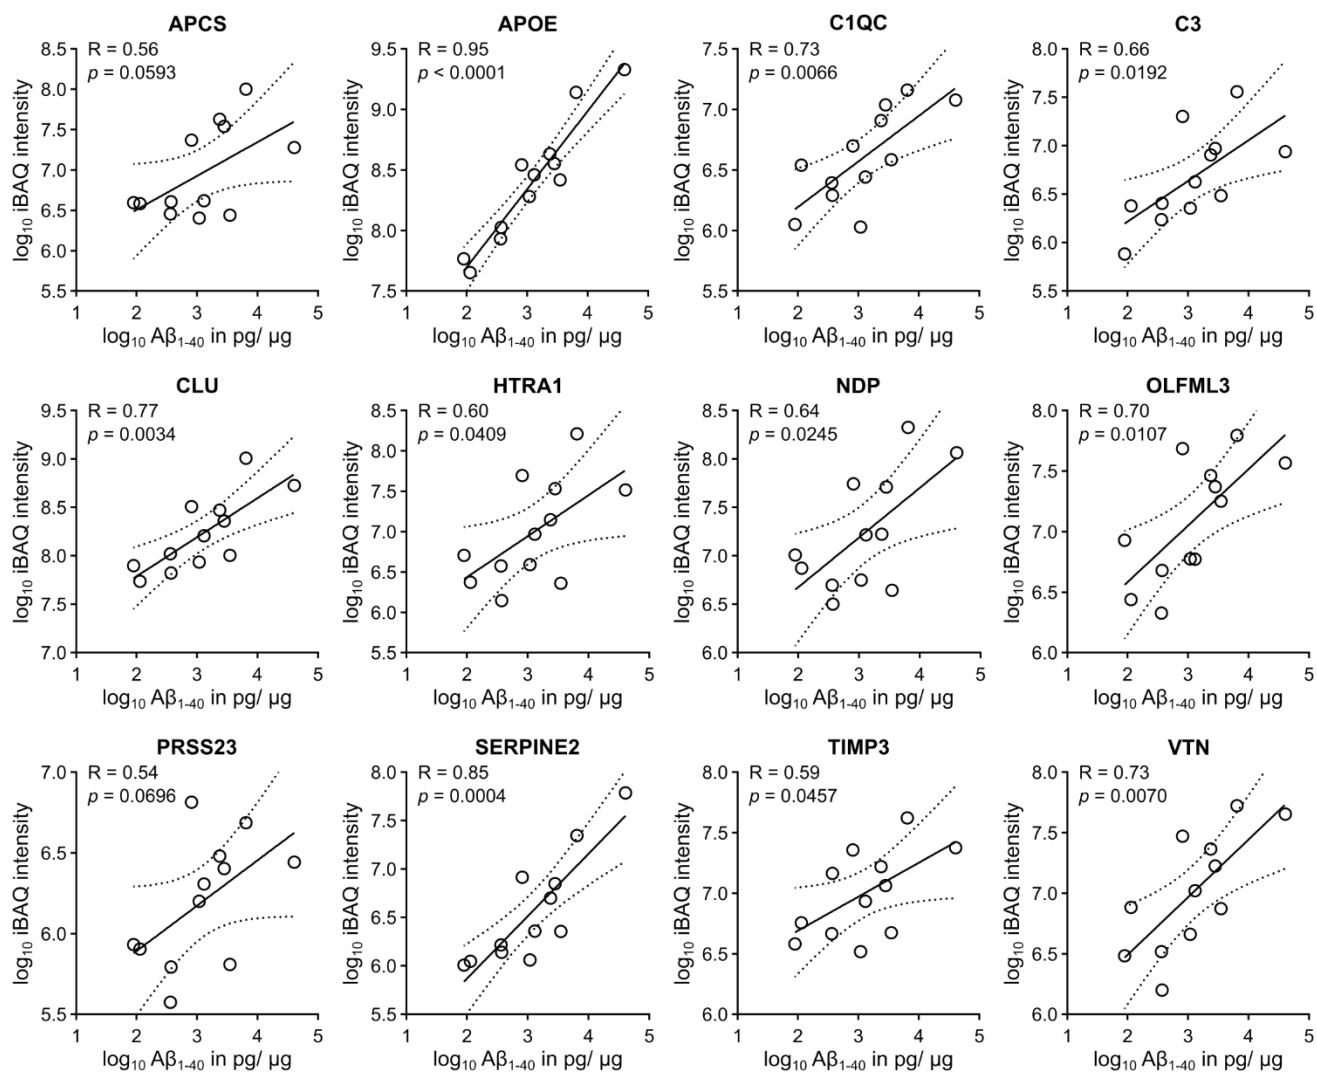

**Fig. S1 Shared proteins between CAA and CADASIL reveal high correlation with Aβ<sub>1-40</sub>**

Scatter plots of log<sub>10</sub> iBAQ intensities and log<sub>10</sub> Aβ<sub>1-40</sub> intensities (determined by ELISA) for the 12 proteins enriched in CAA and CADASIL microvessel extracts. *p*-values and correlation coefficients were calculated via linear regression analysis.
